# Supplementary material for: Could 18-FDG PET-CT Radiomic Features Predict the Locoregional Progression-Free Survival in Inoperable or Unresectable Oesophageal Cancer?
Source: MDPI journal article supplement (doi:10.3390/cancers14164043), 2022-08-22
Supplement: s1 [file s1]

*Table 1. List of the 55 variables that were used in the heat map definition. Please, refer to [23] for a precise definition of each variable.*

|                             |
|-----------------------------|
| L_minor                     |
| F_stat_entropy              |
| L_least                     |
| F_rlm_merged_glnu           |
| F_rlm_2_5D_glnu             |
| F_szm_2_5D_glnu_norm        |
| F_szm_2_5D_gl_var           |
| F_rlm_2_5D_rlnu             |
| F_szm_2_5D_glnu             |
| F_szm_2_5D_zs_var           |
| F_cm_2_5D_clust_shade       |
| F_stat_median               |
| F_szm_zsnu                  |
| F_stat_energy               |
| F_rlm_rl_entr               |
| F_rlm_2_5D_rl_entr          |
| F_cm_2_5D_info_corr_2       |
| F_cm_2_5Dmerged_info_corr_2 |
| F_cm_2_5D_diff_var          |
| F_rlm_2_5D_sre              |
| F_zsm_z_perc                |
| F_szm_size                  |
| F_rlm_merged_sre            |
| F_cm_inv_diff_mom_norm      |
| F_cm_2_5D_inv_diff_mom_norm |
| F_cm_merged_inv_diff_norm   |
| F_cm_2_5D_inv_diff_norm     |
| F_stat_Nic_entropy          |
| F_stat_min                  |

|                                 |
|---------------------------------|
| F_szm_lzhge                     |
| F_szm_zs_var                    |
| F_rlm_2_5D_rl_var               |
| F_szm_lzlge                     |
| F_szm_2_5D_z_entr               |
| F_morph_com                     |
| L_major                         |
| F_cm_2_5D_joint_max             |
| F_cm_info_corr_1                |
| F_rlm_r_perc                    |
| F_stat_kurt                     |
| F_szm_zsnu_norm                 |
| F_cm_energy                     |
| F_szm_szlge                     |
| F_rlm_2_5D_srlge                |
| F_rlm_merged_lrlge              |
| F_rlm_2_5D_lrlrlm_25D_merged_df |
| F_cm_2_5D_info_corr_1           |
| F_stat_uniformity               |
| F_rlm_glnu_norm                 |
| F_morph_av                      |
| F_cm_2_5D_inv_var               |
| F_cm_inv_var                    |
| F_morph_sphericity              |
| F_morph_pca_elongation          |
| F_morph_pca_flatness            |
